# Supplementary material for: Statin-induced Mitochondrial Priming Sensitizes Multiple Myeloma Cells to BCL2 and MCL-1 Inhibitors
Source: PubMed Central journal article supplement (PMC10704957; doi:10.1158/2767-9764.crc-23-0350), 2023-12-08
Supplement: crc-23-0350-s01.pdf [file crc-23-0350-s01.pdf]

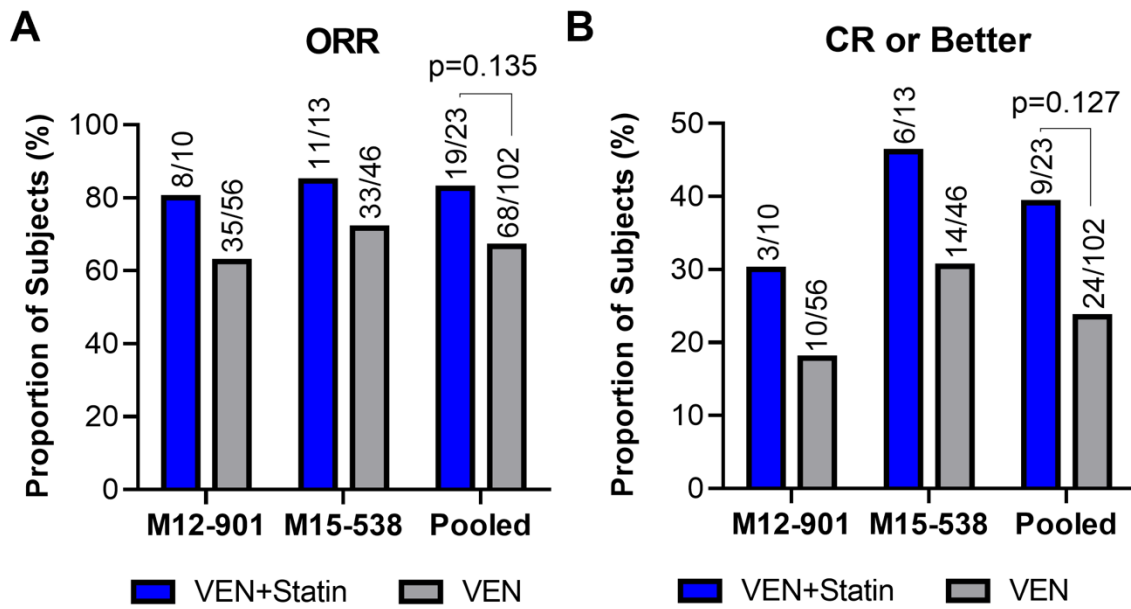

**Figure S1**

**Fig S1: Statin use trends towards improved responses in a retrospective analysis of venetoclax clinical trials in R/R MM.** A univariate analysis as in Figure 1 was applied to the variables ORR (**A**) or CR or better (**B**). Details of the data analysis are in Table S1.
