# Supplementary material for: Statin-induced Mitochondrial Priming Sensitizes Multiple Myeloma Cells to BCL2 and MCL-1 Inhibitors
Source: PubMed Central journal article supplement (PMC10704957; doi:10.1158/2767-9764.crc-23-0350), 2023-12-08
Supplement: crc-23-0350-s05.pdf [file crc-23-0350-s05.pdf]

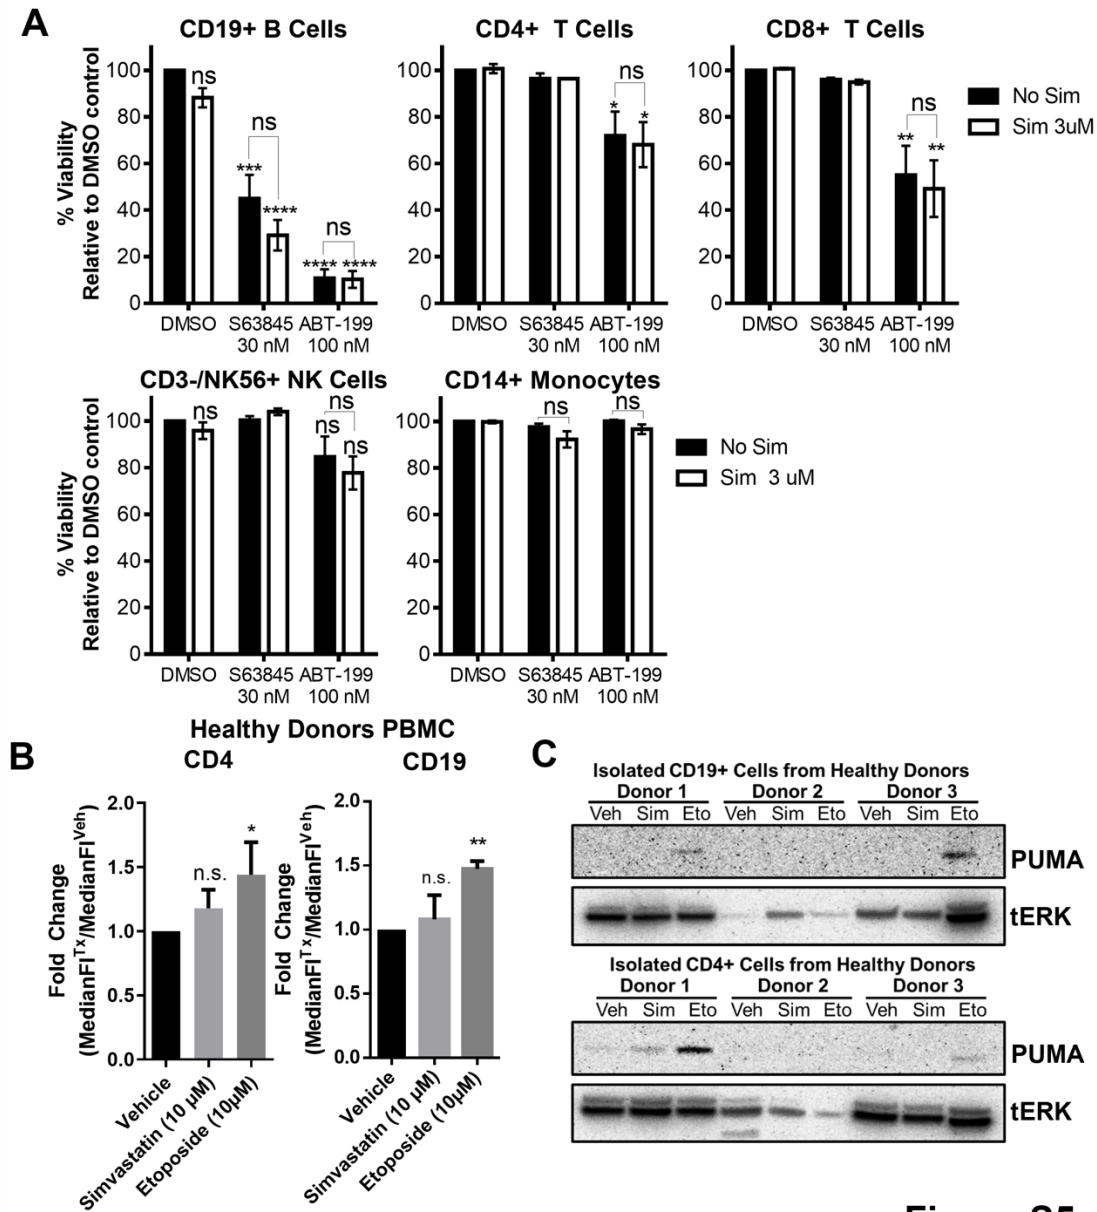

**Figure S5**

**Fig S5: Simvastatin does not promote apoptosis by BH3 Mimetics in Normal PBMC.**

**A.** Healthy donor PBMCs were treated with simvastatin and S63845 or venetoclax and then stained for the indicated cell surface markers and annexin V. Simvastatin at 3  $\mu$ M did not further sensitize to venetoclax or S63845. Significance determined by two-way ANOVA with Tukey's multiple comparison test.

**B.** PUMA was measured in CD4 or CD19+ lymphocytes by intracellular staining. PBMCs were treated with simvastatin or etoposide as a positive control. Etoposide induced increase PUMA staining while simvastatin did not. Significance determined one-way ANOVA with Bonferroni's multiple comparison test.

**C.** Western analysis of isolated lymphocytes from healthy PBMC donors after 16hr treatment. Magnetic beads were used to isolate CD19 and CD4+ cells for western analysis of PUMA. PUMA could only be consistently detected in lymphocytes treated with etoposide.
