# Supplementary material for: Statin-induced Mitochondrial Priming Sensitizes Multiple Myeloma Cells to BCL2 and MCL-1 Inhibitors
Source: PubMed Central journal article supplement (PMC10704957; doi:10.1158/2767-9764.crc-23-0350), 2023-12-08
Supplement: crc-23-0350-s06.pdf [file crc-23-0350-s06.pdf]

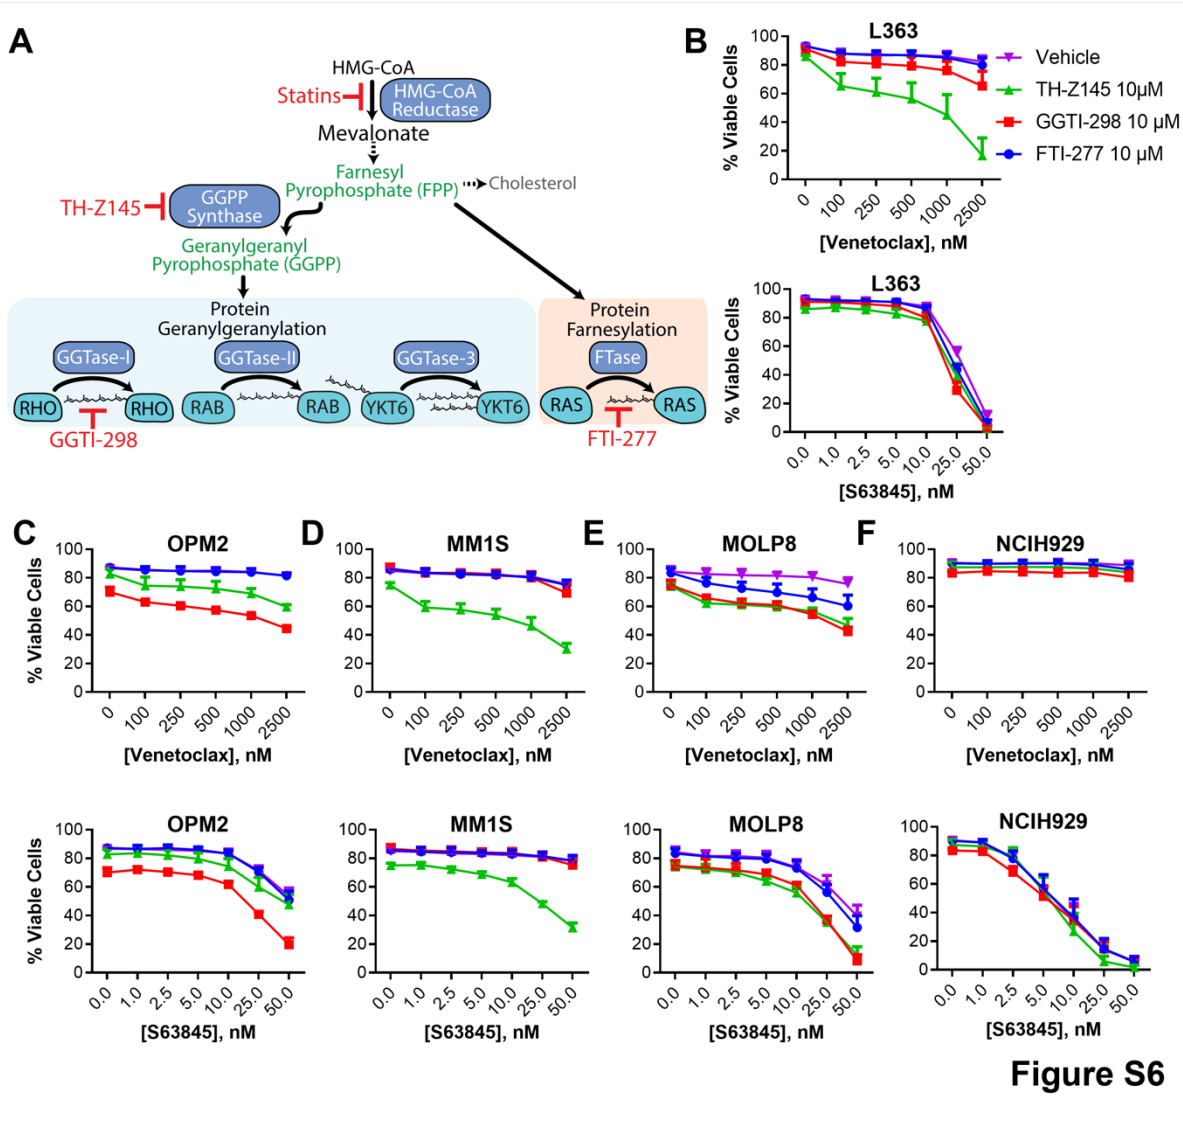

**Figure S6**

**Fig S6: Inhibition of Protein Geranylgeranylation Sensitizes to BH3 Mimetics.**

**A.** Statins impart their effects by depleting FPP and GGPP used for the covalent addition of farnesyl or geranylgeranyl moieties to proteins. FTI-277 is a CAAX-mimetic that inhibits the farnesyltransferase (FTase) enzyme that predominantly acts on Ras family proteins. GGTI-298 is a CAAX-mimetic that inhibits the geranylgeranyltransferase(GGTase)-I enzyme that predominantly acts on Rho/Rac/Rap family proteins. Two additional GGTase enzymes exist with

different substrate binding capacities. GGTase-II modifies RAB proteins whereas the novel GGTase-3 acts on YKT6 and FBXL2 and likely other yet to be described substrates. TH-Z145 is a bisphosphonate-like inhibitor of the GGPP synthase that can specifically deplete GGPP and inhibit all geranylgeranyltransferases.

**B-F.** Results of 48hr annexin V-PI viability assay using the indicated concentrations of each inhibitor.
