# Supplementary material for: Statin-induced Mitochondrial Priming Sensitizes Multiple Myeloma Cells to BCL2 and MCL-1 Inhibitors
Source: PubMed Central journal article supplement (PMC10704957; doi:10.1158/2767-9764.crc-23-0350), 2023-12-08
Supplement: crc-23-0350-s07.pdf [file crc-23-0350-s07.pdf]

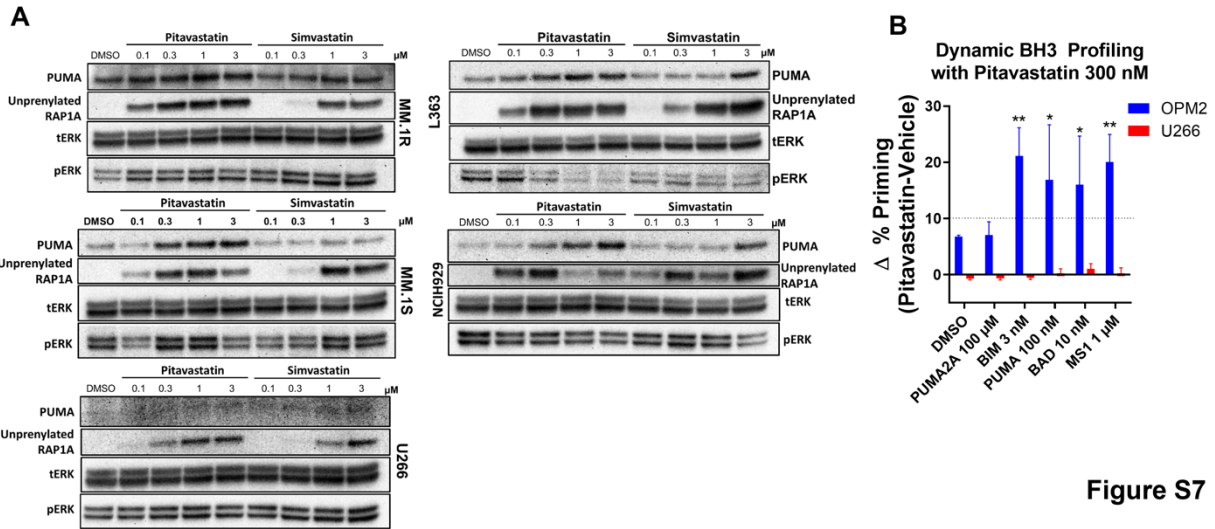

**Figure S7**

**Fig S7: Pitavastatin activity on biomarkers of prenylation and cell death.**

**A.** Pitavastatin increases PUMA, blocks prenylation, and affects phosphorylated ERK at concentrations lower than simvastatin in several MMCLs

**B.** 300 nM Pitavastatin sensitizes to apoptosis as measured by BH3 profiling in OPM2. Significance determined by student's t-test against untreated samples.
