# Supplementary material for: Statin-induced Mitochondrial Priming Sensitizes Multiple Myeloma Cells to BCL2 and MCL-1 Inhibitors
Source: PubMed Central journal article supplement (PMC10704957; doi:10.1158/2767-9764.crc-23-0350), 2023-12-08
Supplement: crc-23-0350-s08.pdf [file crc-23-0350-s08.pdf]

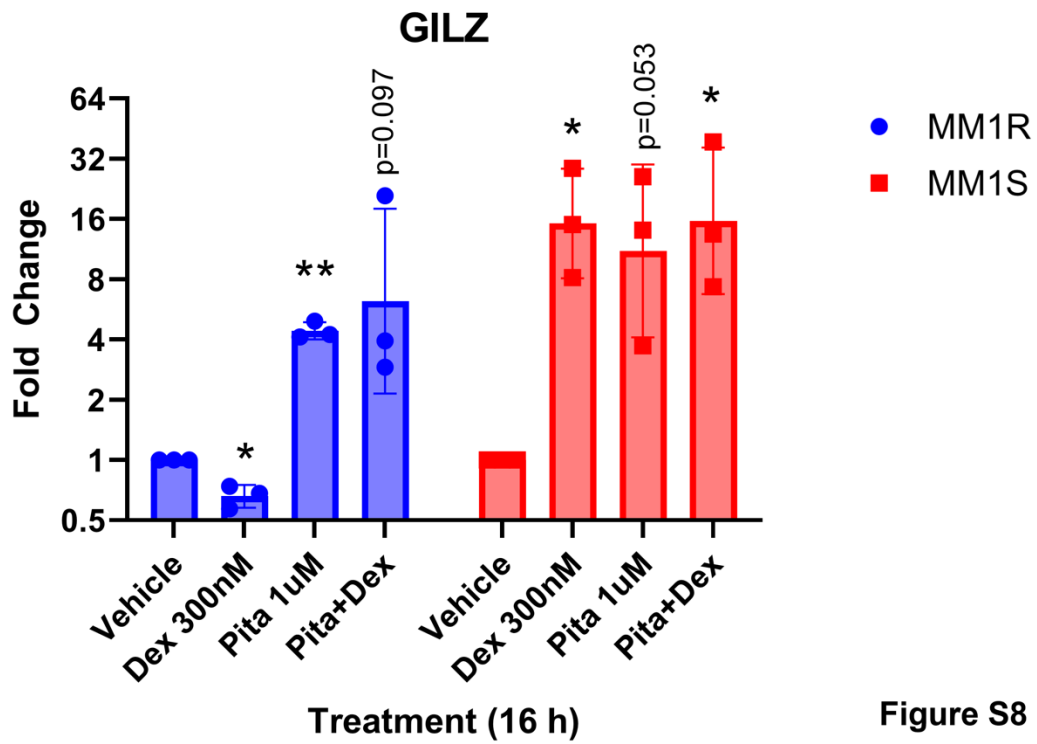

**Figure S8**

**Fig S8: Pitavastatin and Dexamethasone Upregulate GILZ.** Statins increase GILZ transcript expression in a dexamethasone resistance model as measured by qPCR. Significance ( $p < 0.05$ ) determined by one-sample t test of log transformed fold changes against the value of 0.
