# Supplementary material for: Statin-induced Mitochondrial Priming Sensitizes Multiple Myeloma Cells to BCL2 and MCL-1 Inhibitors
Source: PubMed Central journal article supplement (PMC10704957; doi:10.1158/2767-9764.crc-23-0350), 2023-12-08
Supplement: crc-23-0350-s09.pdf [file crc-23-0350-s09.pdf]

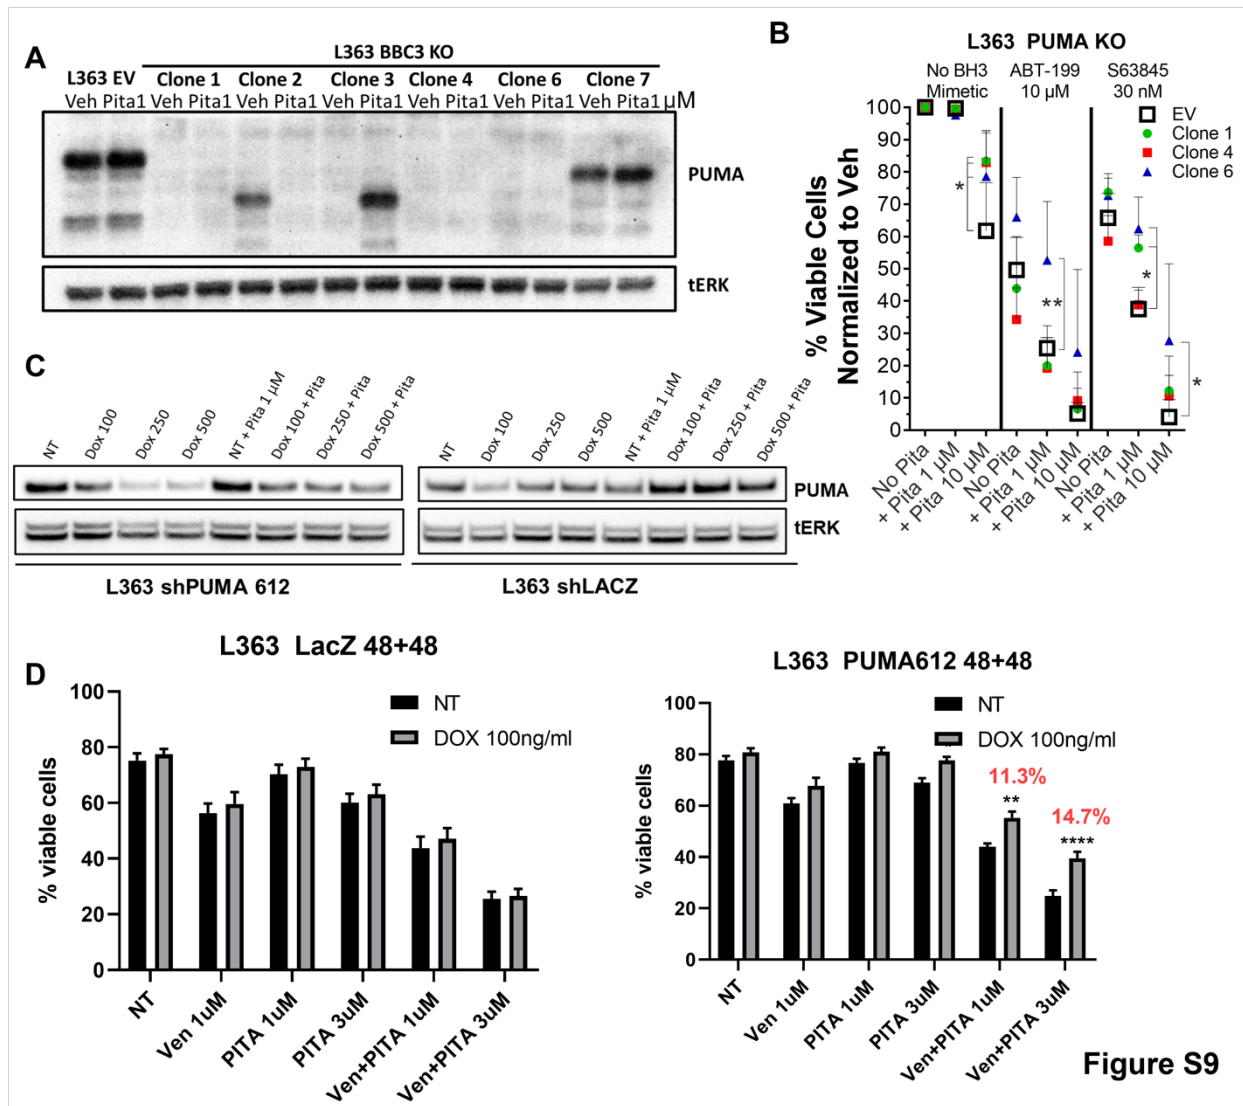

Figure S9

**Fig S9: PUMA upregulation partially explains statin-mediated apoptotic sensitization.**

**A.** We used CRISPR-cas9 to generate knockouts of PUMA and confirmed PUMA knockout at the protein level in single cell L363 clones.

**B.** 48hr Annexin V/PI viability assays were used to assess the effect of PUMA knockout on statin-mediated sensitization of apoptosis in three single cell clones compared to a pool expressing a non-targeting empty vector. Significance was assessed by one-way ANOVA with Tukey's post-test correction for multiple comparisons.

**C.** Knockdown of PUMA with a doxycycline inducible shRNA was confirmed at the protein level at 100 ng/mL doxycycline for 96 hours.

**D.** Doxycycline inducible shRNA-mediated knockdown of PUMA from pitavastatin partially attenuated sensitization to venetoclax whereas the shLACZ did not have any effect. Significance determined by student's t test.
