# Supplementary material for: Statin-induced Mitochondrial Priming Sensitizes Multiple Myeloma Cells to BCL2 and MCL-1 Inhibitors
Source: PubMed Central journal article supplement (PMC10704957; doi:10.1158/2767-9764.crc-23-0350), 2023-12-08
Supplement: crc-23-0350-s11.pdf [file crc-23-0350-s11.pdf]

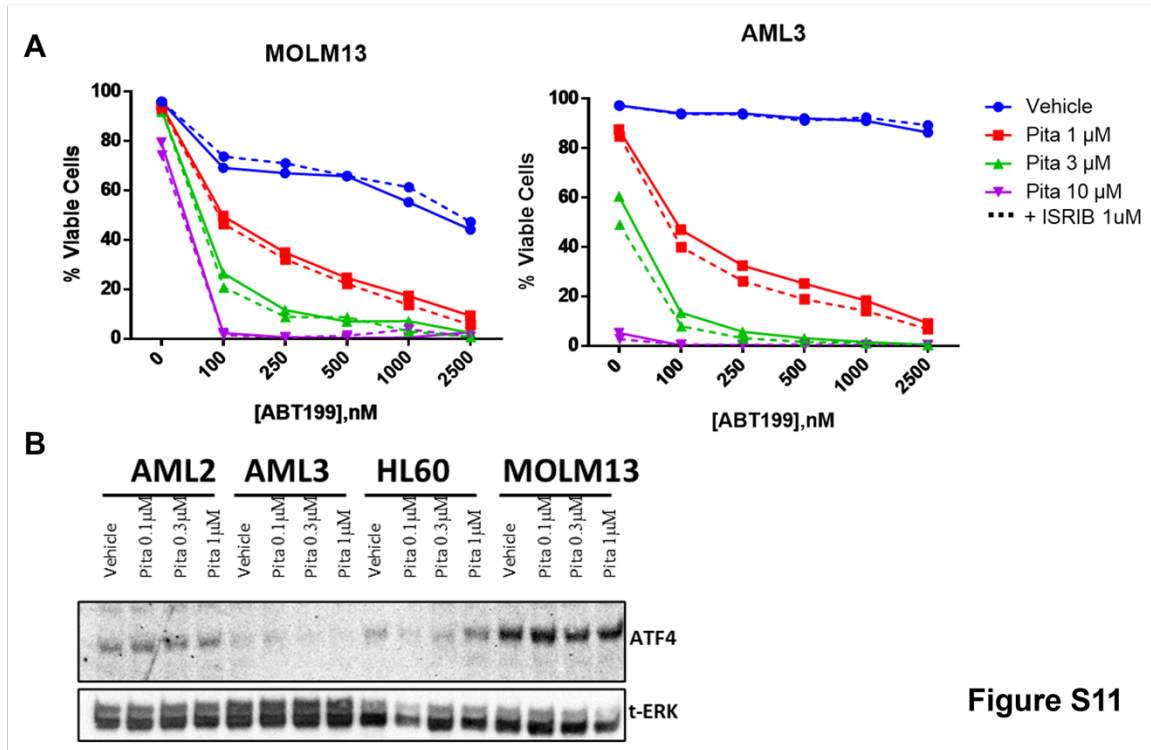

**Figure S11**

**Fig S11: ISRIB does not rescue from statin-mediated apoptotic sensitization in AML Cell Lines.**

**A.** The statin sensitive AML cell lines, MOLM13 and OCI-AML3 (AML3) are not rescued with ISRIB, n = 1.

**B.** AML cell lines do not upregulate ATF4 in response to pitavastatin treatment. Similar results were observed in a second experiment using AML3 cells.
