# Supplementary material for: Statin-induced Mitochondrial Priming Sensitizes Multiple Myeloma Cells to BCL2 and MCL-1 Inhibitors
Source: PubMed Central journal article supplement (PMC10704957; doi:10.1158/2767-9764.crc-23-0350), 2023-12-08
Supplement: crc-23-0350-s14.pdf [file crc-23-0350-s14.pdf]

**Table S1: Univariate analysis of pooled clinical trial data on R/R MM patient response to venetoclax treatment grouped by statin use.** “VEN + Statin” includes patients with at least one dose of venetoclax and with use of Statin. VEN + Statin patients received at least 1 statin medication given before the first response date. “VEN” includes patients with at least one dose of venetoclax and without use of Statin. VEN may include patients treated with only VEN or patients that started a statin after the first response date. The 95% CI for rate is computed using clopper-pearson method. \* P-value  $\leq 0.05$ ; \*\* P-value  $\leq 0.01$ ; \*\*\* P-value  $< 0.001$ .

|                                      | VEN + Statin (N=23)    | VEN (N=102)            | All Subjects (N=125)   | Two-sided P-value   |
|--------------------------------------|------------------------|------------------------|------------------------|---------------------|
| Best Overall Response                | n (%) [95% CI of Rate] | n (%) [95% CI of Rate] | n (%) [95% CI of Rate] | VEN + Statin vs VEN |
| Stringent Complete Response (sCR)    | 7 (30.4) [13.2, 52.9]  | 6 (5.9) [2.2, 12.4]    | 13 (10.4) [5.7, 17.1]  | <0.001***           |
| Complete Response (CR)               | 2 (8.7) [1.1, 28.0]    | 18 (17.6) [10.8, 26.4] | 20 (16.0) [10.1, 23.6] | 0.292               |
| Very Good Partial Response (VGPR)    | 5 (21.7) [7.5, 43.7]   | 26 (25.5) [17.4, 35.1] | 31 (24.8) [17.5, 33.3] | 0.708               |
| Partial Response (PR)                | 5 (21.7) [7.5, 43.7]   | 18 (17.6) [10.8, 26.4] | 23 (18.4) [12.0, 26.3] | 0.649               |
| Overall Response (sCR+CR+VGPR+PR)    | 19 (82.6) [61.2, 95.0] | 68 (66.7) [56.6, 75.7] | 87 (69.6) [60.7, 77.5] | 0.135               |
| Complete Response or Better (sCR+CR) | 9 (39.1) [19.7, 61.5]  | 24 (23.5) [15.7, 33.0] | 33 (26.4) [18.9, 35.0] | 0.127               |
