# Supplementary material for: Statin-induced Mitochondrial Priming Sensitizes Multiple Myeloma Cells to BCL2 and MCL-1 Inhibitors
Source: PubMed Central journal article supplement (PMC10704957; doi:10.1158/2767-9764.crc-23-0350), 2023-12-08
Supplement: crc-23-0350-s15.pdf [file crc-23-0350-s15.pdf]

**Table S2: Univariate analysis of pooled clinical trial data on R/R MM patient response to venetoclax treatment grouped by prior lines of therapy =1 or >1. “VEN + 1 therapy”**

includes patients with at least one dose of venetoclax and with 1 line of prior therapy. “VEN + > 1 therapy” includes patients with at least one dose of Venetoclax with > 1 lines of prior therapy.

P-value is based on CMH test. The 95% CI for rate is computed using clopper-pearson method. \*

P-value ≤ 0.05; \*\* P-value ≤ 0.01; \*\*\* P-value < 0.001.

|                                      | VEN + 1 Therapy<br>(N=49) | VEN + >1 Therapy<br>(N=76) | All Subjects (N=125)   | Two-sided<br>P-value                         |
|--------------------------------------|---------------------------|----------------------------|------------------------|----------------------------------------------|
| Best Overall Response                | n (%) [95% CI of Rate]    | n (%) [95% CI of Rate]     | n (%) [95% CI of Rate] | VEN + 1<br>Therapy vs<br>VEN + >1<br>Therapy |
| Stringent Complete Response (sCR)    | 5 (10.2) [3.4, 22.2]      | 8 (10.5) [4.7, 19.7]       | 13 (10.4) [5.7, 17.1]  | 0.954                                        |
| Complete Response (CR)               | 12 (24.5) [13.3, 38.9]    | 8 (10.5) [4.7, 19.7]       | 20 (16.0) [10.1, 23.6] | 0.038*                                       |
| Very Good Partial Response (VGPR)    | 12 (24.5) [13.3, 38.9]    | 19 (25.0) [15.8, 36.3]     | 31 (24.8) [17.5, 33.3] | 0.949                                        |
| Partial Response (PR)                | 8 (16.3) [7.3, 29.7]      | 15 (19.7) [11.5, 30.5]     | 23 (18.4) [12.0, 26.3] | 0.632                                        |
| Overall Response (sCR+CR+VGPR+PR)    | 37 (75.5) [61.1, 86.7]    | 50 (65.8) [54.0, 76.3]     | 87 (69.6) [60.7, 77.5] | 0.251                                        |
| Complete Response or Better (sCR+CR) | 17 (34.7) [21.7, 49.6]    | 16 (21.1) [12.5, 31.9]     | 33 (26.4) [18.9, 35.0] | 0.092                                        |
