# Supplementary material for: Statin-induced Mitochondrial Priming Sensitizes Multiple Myeloma Cells to BCL2 and MCL-1 Inhibitors
Source: PubMed Central journal article supplement (PMC10704957; doi:10.1158/2767-9764.crc-23-0350), 2023-12-08
Supplement: crc-23-0350-s16.pdf [file crc-23-0350-s16.pdf]

**Table S3: Univariate analysis of pooled clinical trial data on R/R MM patient response to venetoclax treatment grouped by t(11;14) status.** “VEN + T1114+” includes patients with at least one dose of venetoclax and with the t(11;14) translocation. “VEN + T1114-” includes patients with at least one dose of venetoclax without the t(11;14) translocation. P-value is based on CMH test. The 95% CI for rate is computed using clopper-pearson method. \* P-value  $\leq$  0.05; \*\* P-value  $\leq$  0.01; \*\*\* P-value  $<$  0.001.

|                                      | VEN + T1114+ (N=32)    | VEN + T1114- (N=87)    | All Subjects (N=119)   | Two-sided P-value            |
|--------------------------------------|------------------------|------------------------|------------------------|------------------------------|
| Best Overall Response                | n (%) [95% CI of Rate] | n (%) [95% CI of Rate] | n (%) [95% CI of Rate] | VEN + T1114+ vs VEN + T1114- |
| Stringent Complete Response (sCR)    | 3 (9.4) [2.0, 25.0]    | 10 (11.5) [5.7, 20.1]  | 13 (10.9) [5.9, 18.0]  | 0.744                        |
| Complete Response (CR)               | 6 (18.8) [7.2, 36.4]   | 11 (12.6) [6.5, 21.5]  | 17 (14.3) [8.5, 21.9]  | 0.401                        |
| Very Good Partial Response (VGPR)    | 8 (25.0) [11.5, 43.4]  | 22 (25.3) [16.6, 35.7] | 30 (25.2) [17.7, 34.0] | 0.975                        |
| Partial Response (PR)                | 7 (21.9) [9.3, 40.0]   | 14 (16.1) [9.1, 25.5]  | 21 (17.6) [11.3, 25.7] | 0.465                        |
| Overall Response (sCR+CR+VGPR+PR)    | 24 (75.0) [56.6, 88.5] | 57 (65.5) [54.6, 75.4] | 81 (68.1) [58.9, 76.3] | 0.327                        |
| Complete Response or Better (sCR+CR) | 9 (28.1) [13.7, 46.7]  | 21 (24.1) [15.6, 34.5] | 30 (25.2) [17.7, 34.0] | 0.658                        |
