# Supplementary material for: Statin-induced Mitochondrial Priming Sensitizes Multiple Myeloma Cells to BCL2 and MCL-1 Inhibitors
Source: PubMed Central journal article supplement (PMC10704957; doi:10.1158/2767-9764.crc-23-0350), 2023-12-08
Supplement: crc-23-0350-s17.pdf [file crc-23-0350-s17.pdf]

**Table S4: Univariate analysis of pooled clinical trial data on R/R MM patient response to venetoclax treatment grouped by cytogenetic risk status according to IMWG criteria.**

“VEN + RiskS” includes patients with at least one dose of venetoclax and with standard cytogenetics risk. “VEN + RiskH” includes patients with at least one dose of venetoclax with high cytogenetics risk. P-value is based on CMH test. The 95% CI for rate is computed using clopper-pearson method. \* P-value  $\leq 0.05$ ; \*\* P-value  $\leq 0.01$ ; \*\*\* P-value  $< 0.001$ .

|                                      | VEN + RiskS (N=78)     | VEN + RiskH (N=35)     | All Subjects (N=113)   | Two-sided P-value             |
|--------------------------------------|------------------------|------------------------|------------------------|-------------------------------|
| Best Overall Response                | n (%) [95% CI of Rate] | n (%) [95% CI of Rate] | n (%) [95% CI of Rate] | VEN + RiskS vs<br>VEN + RiskH |
| Stringent Complete Response (sCR)    | 11 (14.1) [7.3, 23.8]  | 0 [0.0, 10.0]          | 11 (9.7) [5.0, 16.8]   | 0.020*                        |
| Complete Response (CR)               | 8 (10.3) [4.5, 19.2]   | 8 (22.9) [10.4, 40.1]  | 16 (14.2) [8.3, 22.0]  | 0.077                         |
| Very Good Partial Response (VGPR)    | 19 (24.4) [15.3, 35.4] | 11 (31.4) [16.9, 49.3] | 30 (26.5) [18.7, 35.7] | 0.433                         |
| Partial Response (PR)                | 17 (21.8) [13.2, 32.6] | 4 (11.4) [3.2, 26.7]   | 21 (18.6) [11.9, 27.0] | 0.192                         |
| Overall Response (sCR+CR+VGPR+PR)    | 55 (70.5) [59.1, 80.3] | 23 (65.7) [47.8, 80.9] | 78 (69.0) [59.6, 77.4] | 0.612                         |
| Complete Response or Better (sCR+CR) | 19 (24.4) [15.3, 35.4] | 8 (22.9) [10.4, 40.1]  | 27 (23.9) [16.4, 32.8] | 0.863                         |
