# Supplementary material for: Statin-induced Mitochondrial Priming Sensitizes Multiple Myeloma Cells to BCL2 and MCL-1 Inhibitors
Source: PubMed Central journal article supplement (PMC10704957; doi:10.1158/2767-9764.crc-23-0350), 2023-12-08
Supplement: crc-23-0350-s18.pdf [file crc-23-0350-s18.pdf]

**Table S5: Multivariate analysis of pooled clinical trial data on R/R MM patients achieving complete response (CR) or better.** Three baseline characteristics were considered in addition to statin usage as independent variables in a multivariate analysis to evaluate their association with achieving a CR or better, including t(11;14 status), prior lines of therapy, and cytogenetics risk.

| Coefficients                           | Estimate | Std.Error | P-value | Odds Ratio | Lower 95% CI | Upper 95% CI |
|----------------------------------------|----------|-----------|---------|------------|--------------|--------------|
| Intercept                              | -0.915   | 0.512     | 0.074   |            |              |              |
| T(11;14) Status (Positive vs Negative) | 0.539    | 0.519     | 0.299   | 1.714      | 0.62         | 4.742        |
| Prior Lines Therapy (> 1 vs 1)         | -0.847   | 0.467     | 0.07    | 0.429      | 0.172        | 1.07         |
| Cytogenetics Risk (Standard vs High)   | -0.156   | 0.504     | 0.757   | 0.856      | 0.319        | 2.297        |
| Statin Usage (Yes vs No)               | 1.02     | 0.544     | 0.061   | 2.773      | 0.954        | 8.055        |
