# Supplementary material for: Statin-induced Mitochondrial Priming Sensitizes Multiple Myeloma Cells to BCL2 and MCL-1 Inhibitors
Source: PubMed Central journal article supplement (PMC10704957; doi:10.1158/2767-9764.crc-23-0350), 2023-12-08
Supplement: crc-23-0350-s20.pdf [file crc-23-0350-s20.pdf]

**Table S7: IC50 values for venetoclax and S63845 in MM cells without or with simvastatin.**

Viability is normalized to the baseline viability of vehicle or simvastatin alone to determine the IC50 of the BH3 mimetic in the respective condition from a variable slope hill model. MMCLs are ordered by most synergy. Significance is determined by extra sum-of-squares F test with an  $\alpha = 0.0167$  for 3 multiple comparisons. P values are adjusted for multiple comparisons. \*  $p < 0.05$ , \*\*  $p < 0.01$ , \*\*\*  $p < 0.001$ , \*\*\*\*  $p < 0.0001$ .

| MMCL     | [Sim] in $\mu\text{M}$ | BH3 Mimetic | BH3 Mimetic IC50 with Veh in nM | BH3 Mimetic IC50 with Sim in nM | P adj          |
|----------|------------------------|-------------|---------------------------------|---------------------------------|----------------|
| OPM2     | 3                      | VEN         | >10 $\mu\text{M}$               | 3838                            | 0.0009 ***     |
| OPM2     | 1                      | VEN         | >10 $\mu\text{M}$               | 8505                            | 0.13           |
| L363     | 10                     | VEN         | >10 $\mu\text{M}$               | 894.20                          | < 0.00010 **** |
| L363     | 3                      | VEN         | >10 $\mu\text{M}$               | >10 $\mu\text{M}$               | n.s.           |
| KMS12PE  | 10                     | VEN         | 7.37                            | 2.56                            | < 0.00010 **** |
| KMS12PE  | 3                      | VEN         | 7.37                            | 3.10                            | < 0.00010 **** |
| RPMI8226 | 10                     | VEN         | >10 $\mu\text{M}$               | >10 $\mu\text{M}$               | n.s.           |
| RPMI8226 | 3                      | VEN         | >10 $\mu\text{M}$               | >10 $\mu\text{M}$               | n.s.           |
| NCIH929  | 10                     | VEN         | >10 $\mu\text{M}$               | >10 $\mu\text{M}$               | n.s.           |
| NCIH929  | 3                      | VEN         | >10 $\mu\text{M}$               | >10 $\mu\text{M}$               | n.s.           |
| U266     | 10                     | VEN         | >10 $\mu\text{M}$               | >10 $\mu\text{M}$               | n.s.           |
| U266     | 3                      | VEN         | >10 $\mu\text{M}$               | >10 $\mu\text{M}$               | n.s.           |
| MOLP8    | 10                     | VEN         | Cannot Fit Hill                 | Cannot Fit Hill                 | N/A            |
| MOLP8    | 3                      | VEN         | Cannot Fit Hill                 | Cannot Fit Hill                 | N/A            |
| NCIH929  | 10                     | S63845      | 53.22                           | 8.69                            | < 0.00010 **** |
| NCIH929  | 3                      | S63845      | 53.22                           | 16.47                           | < 0.00010 **** |
| OPM2     | 3                      | S63845      | 28.50                           | 12.26                           | < 0.00010 **** |
| OPM2     | 1                      | S63845      | 28.50                           | 17.81                           | < 0.00010 **** |
| L363     | 10                     | S63845      | 25.94                           | 4.72                            | < 0.00010 **** |
| L363     | 3                      | S63845      | 25.94                           | 14.21                           | < 0.00010 **** |
| MOLP8    | 10                     | S63845      | 12.92                           | 3.59                            | 0.00090 ***    |
| MOLP8    | 3                      | S63845      | 12.92                           | 4.12                            | 0.00090 ***    |
| RPMI8226 | 10                     | S63845      | 93.89                           | 74.64                           | 0.077          |
| RPMI8226 | 3                      | S63845      | 93.89                           | 85.95                           | 0.98           |
| KMS12PE  | 10                     | S63845      | 117.60                          | 75.47                           | 0.016 *        |
| KMS12PE  | 3                      | S63845      | 117.60                          | 93.42                           | 0.41           |
| U266     | 10                     | S63845      | >10 $\mu\text{M}$               | >10 $\mu\text{M}$               | n.s.           |
| U266     | 3                      | S63845      | >10 $\mu\text{M}$               | >10 $\mu\text{M}$               | n.s.           |
