# Supplementary material for: Statin-induced Mitochondrial Priming Sensitizes Multiple Myeloma Cells to BCL2 and MCL-1 Inhibitors
Source: PubMed Central journal article supplement (PMC10704957; doi:10.1158/2767-9764.crc-23-0350), 2023-12-08
Supplement: crc-23-0350-s21.pdf [file crc-23-0350-s21.pdf]

**Table S8: Calculation and Visualization of synergy scores for Drug Combinations using BLISS and HSA algorithms.** Synergy is determined by SynergyFinder 3.0 web-application.

The “synergy score” is the average of synergy scores over all dose combination measurements for the given synergy model (Bliss: Bliss independence model; HSA: highest single agent) whereas “most synergistic area” describes the average of the most synergistic 3 by 3 dose area in a combination matrix. The antagonism threshold is generally defined as a synergy score less than -10, the additive threshold is defined between -10 and 10, and the synergistic threshold is defined as greater than 10. MMCLs are ordered by the average of the most synergistic area in the Bliss and HSA method.

| MMCL     | Combination  | Synergy Score (Bliss) | Most Synergistic Area (Bliss) | Synergy Score (HSA) | Most Synergistic Area (HSA) |
|----------|--------------|-----------------------|-------------------------------|---------------------|-----------------------------|
| OPM2     | Ven + Sim    | 14.35                 | 22.22                         | 16.36               | 26.43                       |
| L363     | Ven + Sim    | 8.55                  | 17.18                         | 9.65                | 18.86                       |
| KMS12PE  | Ven + Sim    | 9.46                  | 11.14                         | 15.31               | 19.8                        |
| RPMI8226 | Ven + Sim    | 0.95                  | 3.15                          | 2.39                | 6.58                        |
| NCIH929  | Ven + Sim    | 0.5                   | 1.7                           | 3.75                | 6.78                        |
| U266     | Ven + Sim    | 0.75                  | 2.07                          | 1.57                | 2.82                        |
| MOLP8    | Ven + Sim    | -5.9                  | -3.69                         | 1.13                | 2.69                        |
|          |              |                       |                               |                     |                             |
| NCIH929  | S63845 + Sim | 8.89                  | 13.27                         | 15.52               | 24.83                       |
| OPM2     | S63845 + Sim | 8.24                  | 14.05                         | 11.62               | 20                          |
| L363     | S63845 + Sim | 8.58                  | 13.65                         | 10.98               | 17.24                       |
| MOLP8    | S63845 + Sim | 3.14                  | 5.88                          | 10.4                | 15.86                       |
| RPMI8226 | S63845 + Sim | 3.89                  | 6.25                          | 8.5                 | 12.95                       |
| KMS12PE  | S63845 + Sim | 1.66                  | 4.28                          | 5.02                | 10.66                       |
| U266     | S63845 + Sim | 0.67                  | 2.44                          | 1.79                | 3.84                        |
