# Supplementary material for: Statin-induced Mitochondrial Priming Sensitizes Multiple Myeloma Cells to BCL2 and MCL-1 Inhibitors
Source: PubMed Central journal article supplement (PMC10704957; doi:10.1158/2767-9764.crc-23-0350), 2023-12-08
Supplement: crc-23-0350-s22.pdf [file crc-23-0350-s22.pdf]

**Table S9: MM patient cell cytogenetic abnormalities of ex vivo treated patient samples.** Order corresponds with Figure 4D. Top six patient samples were sensitized to venetoclax treatment by statins whereas the bottom six were not.

| <b>Patient</b> | <b>Cytogenetics</b>                            |
|----------------|------------------------------------------------|
| 2263           | t(11;14), +1, -13, del(17p)                    |
| 2269           | +1q, -13                                       |
| 1350           | t(11;14)                                       |
| 1466           | +3, +7, +9, del13q, del(17p)                   |
| 1198           | +1q, -13                                       |
| 1869           | t(4;14)                                        |
| 1724           | vt(11;14), +1p, +1q, +3, +7, +9, -13, del(17p) |
| 1810           | +7, +9, +11, del(13q), +14q                    |
| 1890           | t(4;14), +1q, +3, +9, +11, -13                 |
| 1865           | +1p, +1q, +3, +7, +9, +11, del(17p), +17       |
| 1880           | +1q, +3,+7,+9,-13,+14q                         |
| 1808           | +1q, +3,+7,+9,+11,+14q, del(17p)               |
